# Supplementary material for: Toll-like receptor 1 as a possible target in non-alcoholic fatty liver disease
Source: PubMed Central journal article supplement (PMC8426394; doi:10.1038/s41598-021-97346-9), 2021-09-08
Supplement: 41598_2021_97346_MOESM1_ESM.pdf [file 41598_2021_97346_MOESM1_ESM.pdf]

## **Toll-like receptor 1 as a possible target in non-alcoholic fatty liver disease**

Anja Baumann<sup>1,#</sup>, Anika Nier<sup>1,#</sup>, Angélica Hernández-Arriaga<sup>2</sup>, Annette Brandt<sup>1</sup>, Maria J. Lorenzo Pisarello<sup>1</sup>, Cheng J. Jin<sup>3</sup>, Esther Pilar<sup>1</sup>, Amélia Camarinha-Silva<sup>2</sup>, Jörn M. Schattenberg<sup>4</sup>, Ina Bergheim<sup>1,\*</sup>

<sup>1</sup>Department of Nutritional Sciences, Molecular Nutritional Science, University of Vienna, Vienna, Austria

<sup>2</sup>Institute of Animal Science, University of Hohenheim, Stuttgart, Germany

<sup>3</sup>Institute of Nutrition, SD Model Systems of Molecular Nutrition, Friedrich-Schiller-University Jena, Jena, Germany

<sup>4</sup>Metabolic Liver Research Program, Department of Internal Medicine I, University Medical Center of the Johannes Gutenberg-University, Mainz, Germany

#Authors contributed equally to this work

**\*Corresponding author:** Ina Bergheim, Ph.D.  
University of Vienna  
Department of Nutritional Sciences  
Molecular Nutritional Science  
Althanstraße 14 (UZA2)  
A-1090 Vienna  
Phone: +43-1-4277-54981  
E-Mail: [ina.bergheim@univie.ac.at](mailto:ina.bergheim@univie.ac.at)

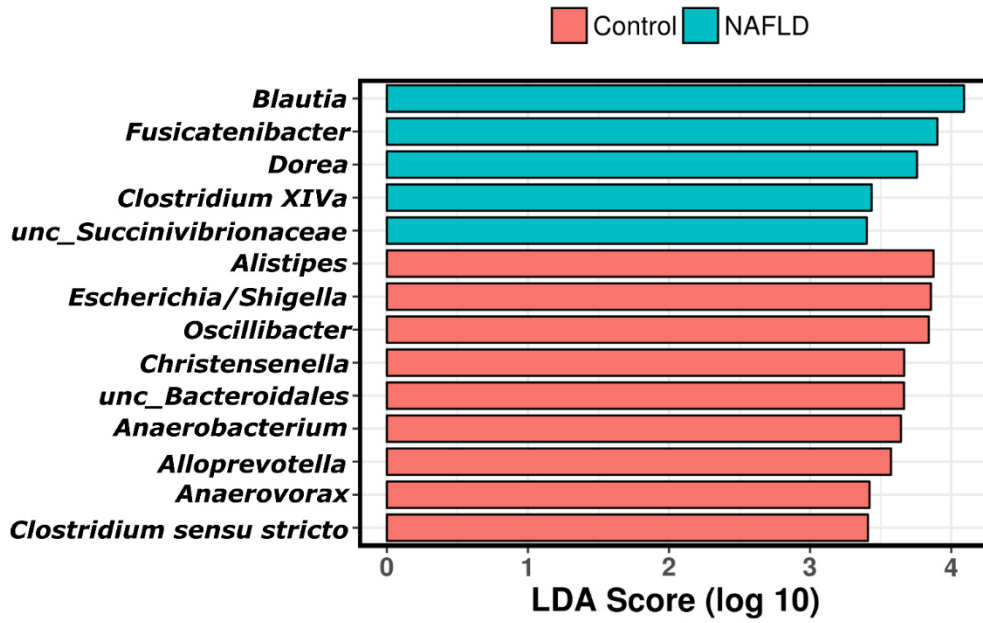

Figure S1. Histogram of the Linear Discriminant Analysis score (LDA) (log 10) computes for features with differential abundances of bacterial communities in NAFLD patients and controls. NAFLD, patients with non-alcoholic fatty liver disease; unc, unclassified.

**Table S1. Expression of markers of Tlr signaling cascade in NAFLD patients and controls.**

|                                                    | <b>C</b>   | <b>NAFLD</b> |
|----------------------------------------------------|------------|--------------|
| <b><i>MYD88</i> mRNA expression (% of control)</b> | 100 ± 14.5 | 117.1 ± 12.7 |
| <b><i>TIRAP</i> mRNA expression (% of control)</b> | 100 ± 15.5 | 171.8 ± 39.2 |
| <b><i>IRF3</i> mRNA expression (% of control)</b>  | 100 ± 14.3 | 119.9 ± 22.1 |

Data are shown as means ± SEM, n=10 controls, n=31 NAFLD patients. C, healthy controls; IRF3, interferon regulatory factor 3; MYD88, myeloid differentiation response 88; NAFLD, patients with non-alcoholic fatty liver disease; TIRAP, TIR domain containing adaptor protein.

**Table S2. Pearson correlation between the bacterial taxa and expression of *TLR1*.**

| <b>Genera</b>          | <b>Correlation Coefficient</b> | <b><i>P</i> value</b> |
|------------------------|--------------------------------|-----------------------|
| o_Clostridiales        | -0.081                         | 0.72                  |
| g_Streptococcus        | -0.121                         | 0.59                  |
| g_Ruminococcus2        | 0.323                          | 0.14                  |
| <b>g_Ruminococcus</b>  | <b>-0.439*</b>                 | <b>0.04</b>           |
| g_Roseburia            | -0.006                         | 0.98                  |
| g_Romboutsia           | -0.041                         | 0.86                  |
| g_Parabacteroides      | 0.057                          | 0.80                  |
| g_Oscillibacter        | -0.160                         | 0.48                  |
| g_Lactobacillus        | 0.144                          | 0.52                  |
| g_Intestinibacter      | -0.192                         | 0.39                  |
| <b>g_Holdemanella</b>  | <b>0.573*</b>                  | <b>0.01</b>           |
| <b>g_Gemmiger</b>      | <b>-0.419*</b>                 | <b>0.05</b>           |
| g_Fusicatenibacter     | -0.014                         | 0.95                  |
| g_Faecalibacterium     | -0.090                         | 0.69                  |
| g_Escherichia/Shigella | -0.239                         | 0.28                  |
| g_Dorea                | 0.138                          | 0.54                  |
| g_Dialister            | -0.337                         | 0.13                  |
| g_Coproccoccus         | -0.154                         | 0.49                  |
| g_Collinsella          | -0.031                         | 0.89                  |
| g_Clostridium.XVIII    | -0.081                         | 0.72                  |
| g_Clostridium.IV       | -0.060                         | 0.79                  |
| g_Catenibacterium      | 0.210                          | 0.35                  |
| g_Blautia              | -0.120                         | 0.59                  |
| g_Bifidobacterium      | -0.119                         | 0.60                  |
| g_Barnesiella          | -0.165                         | 0.46                  |
| g_Bacteroides          | -0.148                         | 0.51                  |

|                     |        |      |
|---------------------|--------|------|
| g_Anaerostipes      | -0.162 | 0.47 |
| g_Alistipes         | -0.051 | 0.82 |
| f_Ruminococcaceae   | -0.314 | 0.15 |
| f_Lachnospiraceae   | -0.137 | 0.54 |
| f_Coriobacteriaceae | -0.001 | 0.99 |

n=7 controls, n=16 NAFLD patients, \* $p \leq 0.05$ . Letters before the name represents the taxonomical level, g=genus, f=family, o=order.

**Table S3. Primer sequences used for real-time PCR.**

|                         | <b>Forward (5' - 3')</b> | <b>Reverse (5' - 3')</b> |
|-------------------------|--------------------------|--------------------------|
| <b>Human sequences</b>  |                          |                          |
| <b>18S</b>              | gggcccgaagcgttacttt      | cgccgggtccaagaattcac     |
| <b>IRF3</b>             | gaggtgacagccttctaccg     | tgctcacgtagctcatcac      |
| <b>MYD88</b>            | gcacatgggcacatacagac     | gacatggttaggctccctca     |
| <b>TIRAP</b>            | agcccaagaagaggcccaac     | tggcacacgcagacgtgata     |
| <b>TLR1</b>             | agggtcagctggactcaga      | taattttggatgggcaaagc     |
| <b>TLR2</b>             | attgtgccattgctctttc      | ctgcccttgagataccatt      |
| <b>TLR3</b>             | agccttcaacgactgatgct     | ttccagagccgtgctaagt      |
| <b>TLR4</b>             | tgagcagtcgtgctgtatc      | cagggcttttctgagtcgtc     |
| <b>TLR5</b>             | gagcccctacaagggaaaac     | tgctgatggcattgctaaag     |
| <b>TLR6</b>             | caaggccctccaataactca     | cattgcaaggaagagggtta     |
| <b>TLR7</b>             | aaatgtcacagccgtccctac    | ttatttttacacggcgaca      |
| <b>TLR8</b>             | tccttcagtcgtcaatgctg     | cgttggggaacttctgta       |
| <b>TLR9</b>             | aaatggcctttgactcatgg     | acagcagctacaggaagga      |
| <b>TLR10</b>            | actttgccaccacaatctc      | cccagaaaagcccacattta     |
| <b>Murine sequences</b> |                          |                          |
| <b>18S</b>              | gtaaccggtgaacccatt       | ccatccaatcggtagtagcg     |
| <b>F4/80</b>            | tggtgcctccctgactttc      | caaggatccctgccctgcact    |
| <b>Tlr1</b>             | cgctggaccagagtttgt       | cgcaccaggaaggtcagtt      |
| <b>Tnfa</b>             | cagccaaccaggcagcgttct    | cctgccacaagcaggaatga     |

IRF3, interferon regulatory factor 3; MYD88, myeloid differentiation primary response 88; TIRAP, TIR domain containing adaptor protein; TLR, toll-like receptor; Tnf, tumor necrosis factor.
